# Supplementary material
Source: PubMed Central journal article supplement (PMC6639024)

## Supporting Information

### **Title: General Suspect Screening of Maternal Serum to Identify New Environmental Biomonitoring Targets using Quadrupole Time-Of-Flight Mass Spectrometry**

*Roy R. Gerona<sup>1\*</sup>, Jackie M. Schwartz<sup>2</sup>, Janet Pan<sup>2</sup>, Matthew M. Friesen<sup>1</sup>, Thomas Lin<sup>1</sup>, Tracey J. Woodruff<sup>2</sup>*

1 Clinical Toxicology and Environmental Biomonitoring Laboratory, Department of Obstetrics, Gynecology and Reproductive Sciences, University of California, San Francisco

2 Program on Reproductive Health and the Environment, Department of Obstetrics, Gynecology, and Reproductive Sciences, University of California, San Francisco

\*Corresponding Author: Roy R. Gerona, [Roy.Gerona@ucsf.edu](mailto:Roy.Gerona@ucsf.edu), phone: (415) 514-5749

Total number of pages (including cover page): 18

Page S2: Table S1

Page S3: Table S2

Page S4: Table S3

Page S5- S16: Table S4

Page S18: Figure S1

**Table S1 .** Relative sensitivity of LC-QTOF/MS (Agilent LC1260-QTOF/MS 6550) and LC-MS/MS (Agilent LC1260-AB Sciex 5500) platforms.

| <b>Compound</b>        | <b>Limit of Detection (ng/mL)</b> |                 |
|------------------------|-----------------------------------|-----------------|
|                        | <b>LC-QTOF/MS</b>                 | <b>LC-MS/MS</b> |
| Bisphenol A-d16        | 0.2                               | 0.05            |
| Bisphenol A            | 0.2                               | 0.05            |
| Methyl paraben         | 0.1                               | 0.01            |
| Monobutyl phthalate    | 0.2                               | 0.02            |
| Perfluorooctanoic acid | 0.25                              | 0.02            |
| 4-Amino-2-nitrophenol  | 1                                 | 0.025           |

**Table S2.** Reproducibility of data collected from five consecutive test sample runs on the Agilent LC1260 -QTOF/MS 6550

| <b>Sample</b> | <b>% Similarity</b> |
|---------------|---------------------|
| 1             | 74                  |
| 2             | 90                  |
| 3             | 85                  |
| 4             | 82                  |
| 5             | 87                  |

**Table S3.** LC-MS/MS recoveries obtained for low and high concentrations of four representative analytes.

| <b>Compound</b>        | <b>Recovery</b>                        |                                          |
|------------------------|----------------------------------------|------------------------------------------|
|                        | <b>Low Concentration<br/>(1 ng/mL)</b> | <b>High Concentration<br/>(40 ng/mL)</b> |
| Bisphenol A-d16        | 80%                                    | 87%                                      |
| Bisphenol A            | 82%                                    | 90%                                      |
| Monobutyl phthalate    | 85%                                    | 90%                                      |
| Perfluorooctanoic acid | 82%                                    | 88%                                      |

**Table S4.** Detection frequencies of 282 environmental organic acids detected in 20 pregnant women sera

| Compound Name                                                                                                                                               | Formula       | Chemical Class                | Count |
|-------------------------------------------------------------------------------------------------------------------------------------------------------------|---------------|-------------------------------|-------|
| 1,4-Dichlorobenzene metabolite or<br>2,3-Dichlorophenol<br>or 2,4-Dichlorophenol<br>or 2,5-Dichlorophenol<br>or 2,6-Dichlorophenol<br>or 3,4-Dichlorophenol | C6 H4 Cl2 O   | Pesticide metabolite - phenol | 20    |
| 1,4-Dichlorobenzene metabolite or<br>2,3-Dichlorophenol<br>or 2,4-Dichlorophenol<br>or 2,5-Dichlorophenol<br>or 2,6-Dichlorophenol<br>or 3,4-Dichlorophenol | C6 H4 Cl2 O   | Pesticide metabolite - phenol | 2     |
| 1,7-bis(4-Hydroxyphenylthio)-3,5-dioxaheptane                                                                                                               | C17 H20 O4 S2 | Phenol                        | 1     |
| 2-(1,1-Dimethylethyl)phenol or 2-sec-Butylphenol<br>or 4-Butylphenol<br>or 4-sec-Butylphenol<br>or 4-tert-Butylphenol                                       | C10 H14 O     | Phenol                        | 17    |
| 2-(1,1-Dimethylethyl)phenol or 2-sec-Butylphenol<br>or 4-Butylphenol<br>or 4-sec-Butylphenol<br>or 4-tert-Butylphenol                                       | C10 H14 O     | Phenol                        | 13    |
| 2-(1,1-Dimethylethyl)phenol or 2-sec-Butylphenol<br>or 4-Butylphenol<br>or 4-sec-Butylphenol<br>or 4-tert-Butylphenol                                       | C10 H14 O     | Phenol                        | 4     |
| 2-(1,1-Dimethylethyl)phenol or 2-sec-Butylphenol<br>or 4-Butylphenol<br>or 4-sec-Butylphenol<br>or 4-tert-Butylphenol                                       | C10 H14 O     | Phenol                        | 2     |
| 2-(2H-benzotriazol-2-yl)-4,6-bis(1-                                                                                                                         | C30 H29 N3 O  | Phenol                        | 2     |

|                                                                               |                   |        |    |
|-------------------------------------------------------------------------------|-------------------|--------|----|
| methyl-1-phenylethyl)phenol                                                   |                   |        |    |
| 2-(N-ethylperfluorooctane sulfonamido) acetate (Et-PFOSA-AcOH)                | C12 H8 F17 N O4 S | PFC    | 3  |
| 2-(N-methyl-perfluorooctane sulfonamido) acetate (Me-PFOSA-AcOH)              | C11 H6 F17 N O4 S | PFC    | 11 |
| 2-Bromo-4-cyclohexylphenol                                                    | C12 H15 Br O      | Phenol | 1  |
| 2-Chloro-4-methylphenol or 4-Chloro-2-methylphenol or 4-Chloro-3-methylphenol | C7 H7 Cl O        | Phenol | 1  |
| 2-Chloro-4-methylphenol or 4-Chloro-2-methylphenol or 4-Chloro-3-methylphenol | C7 H7 Cl O        | Phenol | 1  |
| 2-Chlorophenol or 3-Chlorophenol or 4-Chlorophenol                            | C6 H5 Cl O        | Phenol | 7  |
| 2-Chlorophenol or 3-Chlorophenol or 4-Chlorophenol                            | C6 H5 Cl O        | Phenol | 2  |
| 2-Cyclohexylphenol or 4-Cyclohexylphenol                                      | C12 H16 O         | Phenol | 20 |
| 2-Cyclohexylphenol or 4-Cyclohexylphenol                                      | C12 H16 O         | Phenol | 13 |
| 2-Ethylphenol or 3-Ethylphenol or 4-Ethylphenol                               | C8 H10 O          | Phenol | 5  |
| 2-Ethylphenol or 3-Ethylphenol or 4-Ethylphenol                               | C8 H10 O          | Phenol | 1  |
| 2-Ethylphenol or 3-Ethylphenol or 4-Ethylphenol                               | C8 H10 O          | Phenol | 1  |
| 2-Hydroxy-4-methoxybenzophenone or PHBB                                       | C14 H12 O3        | Phenol | 10 |
| 2-Hydroxy-4-methoxybenzophenone or PHBB                                       | C14 H12 O3        | Phenol | 4  |
| 2-Isopropoxyphenol or 4-Propoxyphenol                                         | C9 H12 O2         | Phenol | 17 |
| 2-Isopropoxyphenol or 4-Propoxyphenol                                         | C9 H12 O2         | Phenol | 9  |
| 2-Methylphenol or 4-Methylphenol                                              | C7 H8 O           | Phenol | 19 |
| 2-Methylphenol or 4-Methylphenol                                              | C7 H8 O           | Phenol | 9  |

|                                                                                                                     |             |                      |    |
|---------------------------------------------------------------------------------------------------------------------|-------------|----------------------|----|
| 2-Phenylphenol or 3-Phenylphenol<br>or 4-Phenylphenol<br>or Biphenyl metabolite                                     | C12 H10 O   | Pesticide - phenolic | 4  |
| 2-Phenylphenol or 3-Phenylphenol<br>or 4-Phenylphenol<br>or Biphenyl metabolite                                     | C12 H10 O   | Pesticide - phenolic | 2  |
| 2-Phenylphenol or 3-Phenylphenol<br>or 4-Phenylphenol<br>or Biphenyl metabolite                                     | C12 H10 O   | Pesticide - phenolic | 1  |
| 2-sec-Pentylphenol or 4-<br>Isopentylphenol<br>or 4-Pentylphenol<br>or 4-sec-Pentylphenol<br>or 4-tert-Pentylphenol | C11 H16 O   | Phenol               | 19 |
| 2-sec-Pentylphenol or 4-<br>Isopentylphenol<br>or 4-Pentylphenol<br>or 4-sec-Pentylphenol<br>or 4-tert-Pentylphenol | C11 H16 O   | Phenol               | 16 |
| 2-sec-Pentylphenol or 4-<br>Isopentylphenol<br>or 4-Pentylphenol<br>or 4-sec-Pentylphenol<br>or 4-tert-Pentylphenol | C11 H16 O   | Phenol               | 15 |
| 2-sec-Pentylphenol or 4-<br>Isopentylphenol<br>or 4-Pentylphenol<br>or 4-sec-Pentylphenol<br>or 4-tert-Pentylphenol | C11 H16 O   | Phenol               | 14 |
| 2-sec-Pentylphenol or 4-<br>Isopentylphenol<br>or 4-Pentylphenol<br>or 4-sec-Pentylphenol<br>or 4-tert-Pentylphenol | C11 H16 O   | Phenol               | 14 |
| 2,3,4-Trichlorophenol or 2,3,6-<br>Trichlorophenol<br>or 2,4,5-Trichlorophenol<br>or 2,4,6-Trichlorophenol          | C6 H3 Cl3 O | Phenol               | 1  |
| 2,3,6-Trimethylphenol or 4-<br>Propylphenol                                                                         | C9 H12 O    | Phenol               | 14 |
| 2,3,6-Trimethylphenol or 4-<br>Propylphenol                                                                         | C9 H12 O    | Phenol               | 8  |

|                                                                                                                                     |               |                               |    |
|-------------------------------------------------------------------------------------------------------------------------------------|---------------|-------------------------------|----|
| 2,4-bis(1-Methyl-1-phenylethyl)phenol                                                                                               | C24 H26 O     | Phenol                        | 6  |
| 2,4-bis(1,1-Dimethylethyl)phenol or 2,6-bis(1,1-Dimethylethyl)phenol or 4-Octylphenol or 4-tert-Octylphenol                         | C14 H22 O     | Phenol                        | 20 |
| 2,4-bis(1,1-Dimethylethyl)phenol or 2,6-bis(1,1-Dimethylethyl)phenol or 4-Octylphenol or 4-tert-Octylphenol                         | C14 H22 O     | Phenol                        | 16 |
| 2,4-bis(1,1-Dimethylethyl)phenol or 2,6-bis(1,1-Dimethylethyl)phenol or 4-Octylphenol or 4-tert-Octylphenol                         | C14 H22 O     | Phenol                        | 16 |
| 2,4-bis(1,1-Dimethylethyl)phenol or 2,6-bis(1,1-Dimethylethyl)phenol or 4-Octylphenol or 4-tert-Octylphenol                         | C14 H22 O     | Phenol                        | 12 |
| 2,4-bis(1,1-Dimethylpropyl)phenol                                                                                                   | C16 H26 O     | Phenol                        | 13 |
| 2,4-Dibromophenol                                                                                                                   | C6 H4 Br2 O   | Phenol                        | 3  |
| 2,4-Dihydroxyphenone or Methyl paraben or Phenoxyacetic acid                                                                        | C8 H8 O3      | Phenol                        | 19 |
| 2,4-Dihydroxyphenone or Methyl paraben or Phenoxyacetic acid                                                                        | C8 H8 O3      | Phenol                        | 15 |
| 2,4-Dihydroxyphenone or Methyl paraben or Phenoxyacetic acid                                                                        | C8 H8 O3      | Phenol                        | 2  |
| 2,4-Dinitrophenol                                                                                                                   | C6 H4 N2 O5   | Phenol                        | 18 |
| 2,4,4'-Trichloro-2'-hydroxyphenyl ether or Hydroxy trichlorobiphenyl                                                                | C12 H7 Cl3 O2 | Phenol                        | 12 |
| 2,4,4'-Trichloro-2'-hydroxyphenyl ether or Hydroxy trichlorobiphenyl                                                                | C12 H7 Cl3 O2 | Phenol                        | 1  |
| 2,4,6-Tribromophenol                                                                                                                | C6 H3 Br3 O   | Phenol                        | 2  |
| 2,4,6-tris(1,1-Dimethylethyl)phenol or 2,6-bis(1,1-Dimethylethyl)-4-(1-methylpropyl)phenol or 4-Dodecylphenol or 4-Isododecylphenol | C18 H30 O     | Phenol                        | 20 |
| 2,4'- Dichlorophenylmethane metabolite or 4,4-Dichlorophenylmethane metabolite                                                      | C13 H10 Cl2 O | Pesticide metabolite - phenol | 1  |



|                                                           |               |        |    |
|-----------------------------------------------------------|---------------|--------|----|
| or 4,4'-Dichlorophenylmethane metabolite                  |               |        |    |
| 2H-Perfluoro-2-decenoic acid (FOUEA)                      | C10 H2 F16 O2 | PFC    | 2  |
| 2H-Perfluoro-2-octenoic acid FHUEA                        | C8 H2 F12 O2  | PFC    | 1  |
| 3-Hydroxyphenone or 4-Hydroxyphenone                      | C8 H8 O2      | Phenol | 14 |
| 3-Hydroxyphenone or 4-Hydroxyphenone                      | C8 H8 O2      | Phenol | 8  |
| 3-Trifluoromethyl-4-nitrophenol                           | C7 H4 F3 N O3 | Phenol | 4  |
| 3,5-Di-tert-Butylsalicylic acid                           | C15 H22 O3    | Phenol | 20 |
| 4-(Imidazol-1-yl)phenol                                   | C9 H8 N2 O    | Phenol | 4  |
| 4-(Phenylazo)phenol or Fenazox                            | C12 H10 N2 O  | Phenol | 1  |
| 4-Butoxyphenol                                            | C10 H14 O2    | Phenol | 20 |
| 4-Chloro-3,5-dimethylphenol                               | C8 H9 Cl O    | Phenol | 1  |
| 4-Cyclopentylphenol                                       | C11 H14 O     | Phenol | 19 |
| 4-Heptyloxyphenol                                         | C13 H20 O2    | Phenol | 20 |
| 4-Hexyloxyphenol                                          | C12 H18 O2    | Phenol | 20 |
| 4-Hexylphenol                                             | C12 H18 O     | Phenol | 20 |
| 4-Hydroxycoumarin                                         | C9 H6 O3      | Phenol | 5  |
| 4-Nitrophenol                                             | C6 H5 N O3    | Phenol | 20 |
| 4-Nonylphenol or 4-tert-Nonylphenol                       | C15 H24 O     | Phenol | 17 |
| 4-Nonylphenol or 4-tert-Nonylphenol                       | C15 H24 O     | Phenol | 16 |
| 4-Pentyloxyphenol                                         | C9 H13 N      | Phenol | 1  |
| 4-Phenethylphenol                                         | C14 H14 O     | Phenol | 2  |
| 4-Phenoxyphenol or 4,4'-Biphenol                          | C12 H10 O2    | Phenol | 5  |
| 4-Phenoxyphenol or 4,4'-Biphenol                          | C12 H10 O2    | Phenol | 1  |
| 4,4'-(Octahydro-4,7-methano-5H-inden-5-ylidene) bisphenol | C22 H24 O2    | Phenol | 1  |
| 4,4'-butylidenebis[2-(1,1-dimethylethyl)-5-methylphenol]  | C26 H38 O2    | Phenol | 3  |
| 4,4'-Cyclohexylidenebisphenol or                          | C18 H20 O2    | Phenol | 2  |

|                                                        |                     |                               |    |
|--------------------------------------------------------|---------------------|-------------------------------|----|
| Bisphenol Z                                            |                     |                               |    |
| 4,4'-Cyclohexylidenebisphenol or Bisphenol Z           | C18 H20 O2          | Phenol                        | 1  |
| 4,4'-Ethylene diphenol                                 | C14 H14 O2          | Phenol                        | 14 |
| 4,4'-Methylenebis(phenol) or Bisphenol F               | C13 H12 O2          | Phenol                        | 3  |
| 4,4'-Methylenebis(phenol) or Bisphenol F               | C13 H12 O2          | Phenol                        | 2  |
| 4,4'-Thiodiphenol                                      | C12 H10 O2 S        | Phenol                        | 5  |
| 4,4'-Isopropylidenebis(2-phenylphenol) or Bisphenol PH | C27 H24 O2          | Phenol                        | 3  |
| 4,4'-Isopropylidenebis(2-phenylphenol) or Bisphenol PH | C27 H24 O2          | Phenol                        | 2  |
| 6:2 Fluorotelomer sulfonic acid (6:2 FTS)              | C8 H5 F13 O3 S      | PFC                           | 3  |
| Aclonifen metabolite                                   | C12 H9 Cl N2 O4     | Pesticide metabolite - phenol | 4  |
| Ancymidol metabolite                                   | C15 H16 N2 O3       | Pesticide metabolite - phenol | 1  |
| Azamethiphos metabolite                                | C9 H10 Cl N2 O6 P S | Pesticide metabolite - phenol | 3  |
| Bendiocarb metabolite or Dioxacarb metabolite          | C11 H13 N O5        | Pesticide metabolite - phenol | 1  |
| Bendiocarb metabolite or Dioxacarb metabolite          | C11 H13 N O5        | Pesticide metabolite - phenol | 1  |
| Benfuracarb metabolite                                 | C20 H30 N2 O6 S     | Pesticide metabolite - phenol | 1  |
| Benomyl metabolite                                     | C14 H18 N4 O4       | Pesticide metabolite - phenol | 1  |
| Bentazone artifact 2                                   | C10 H14 N2 O2       | Pesticide metabolite - phenol | 1  |
| Benzadox                                               | C9 H9 N O4          | Pesticide-acid                | 1  |
| Benzophenone-1                                         | C13 H10 O3          | Phenol                        | 6  |
| Bioresmethrin metabolite or Resmethrin metabolite      | C22 H26 O4          | Pesticide metabolite - phenol | 12 |
| Bioresmethrin metabolite or Resmethrin metabolite      | C22 H26 O4          | Pesticide metabolite - phenol | 2  |
| Bisphenol A                                            | C15 H16 O2          | Phenol                        | 19 |
| Bisphenol A diglycidyl ether                           | C21 H26 O5          | Phenol                        | 1  |
| Bisphenol A ethoxylate diacrylate                      | C25 H28 O6          | Phenol                        | 4  |
| Bisphenol AF                                           | C15 H10 F6 O2       | Phenol                        | 1  |
| Bisphenol AP                                           | C20 H18 O2          | Phenol                        | 5  |

|                                                   |                   |                               |    |
|---------------------------------------------------|-------------------|-------------------------------|----|
| Bisphenol BP                                      | C25 H20 O2        | Phenol                        | 1  |
| Bisphenol C                                       | C17 H20 O2        | Phenol                        | 1  |
| Bisphenol G                                       | C21 H28 O2        | Phenol                        | 10 |
| Bisphenol M or Bisphenol P                        | C24 H26 O2        | Phenol                        | 1  |
| Bisphenol S                                       | C12 H10 O4 S      | Phenol                        | 10 |
| Bisphenol TMC                                     | C21 H26 O2        | Phenol                        | 2  |
| Bitertanol metabolite                             | C20 H23 N3 O3     | Pesticide metabolite - phenol | 7  |
| Bromoxynil                                        | C7 H3 Br2 N O     | Pesticide - phenolic          | 14 |
| BTUM                                              | C27 H24 N4 O6 S2  | Phenol                        | 5  |
| Butacarb metabolite                               | C16 H25 N O3      | Pesticide metabolite - phenol | 1  |
| Butyl paraben                                     | C11 H14 O3        | Phenol                        | 18 |
| Butylated hydroxyanisole                          | C11 H16 O2        | Phenol                        | 20 |
| Carbofuran (-C2H3NO) metabolite                   | C10 H12 O3        | Pesticide metabolite - phenol | 19 |
| Carbofuran metabolite                             | C12 H15 N O4      | Pesticide metabolite - phenol | 13 |
| Carbofuran or Eugenol                             | C10 H12 O2        | Pesticide - phenolic          | 16 |
| Carbofuran or Eugenol                             | C10 H12 O2        | Pesticide - phenolic          | 6  |
| Carbosulfan metabolite                            | C20 H32 N2 O4 S   | Pesticide metabolite - phenol | 2  |
| Chlorbufam metabolite                             | C11 H10 Cl N O3   | Pesticide metabolite - phenol | 2  |
| Chlordimeform metabolite                          | C10 H13 Cl N2 O   | Pesticide metabolite - phenol | 2  |
| Chlorotoluron metabolite                          | C10 H13 Cl N2 O2  | Pesticide metabolite - phenol | 3  |
| Chlorpropham metabolite                           | C10 H12 Cl N O3   | Pesticide metabolite - phenol | 6  |
| Ciodrin metabolite                                | C14 H19 O7 P      | Pesticide metabolite - phenol | 5  |
| Coumithoate metabolite                            | C17 H21 O6 P S    |                               | 1  |
| Cyphenothrin metabolite                           | C24 H25 N O4      | Pesticide metabolite - phenol | 1  |
| D-8                                               | C15 H16 O4 S      | Phenol                        | 11 |
| Daidzein                                          | C15 H10 O4        | Phenol                        | 5  |
| DEET metabolite or Diethyltoluamide metabolite    | C12 H17 N O2      | Pesticide metabolite - phenol | 4  |
| Desmedipham metabolite or Phenmedipham metabolite | C16 H16 N2 O5     | Pesticide metabolite - phenol | 1  |
| Desmedipham metabolite or Phenmedipham metabolite | C16 H16 N2 O5     | Pesticide metabolite - phenol | 1  |
| Diazinon (Dimpylate) metabolite                   | C12 H21 N2 O4 P S | Pesticide metabolite - phenol | 2  |

|                                                                            |                   |                               |    |
|----------------------------------------------------------------------------|-------------------|-------------------------------|----|
| Dicamba or Dichlorophenoxyacetic acid                                      | C8 H6 Cl2 O3      | Pesticide-acid                | 1  |
| Dichlobenil metabolite                                                     | C7 H3 Cl2 N O     | Pesticide metabolite - phenol | 9  |
| Diethquinalphione metabolite or Phoxim metabolite or Quinalphos metabolite | C12 H15 N2 O4 P S | Pesticide metabolite - phenol | 1  |
| Difenoxuron metabolite                                                     | C16 H18 N2 O4     | Pesticide metabolite - phenol | 11 |
| Difenzoquate metabolite                                                    | C17 H17 N2 O      | Pesticide metabolite - phenol | 1  |
| Diflunisal                                                                 | C14 H8 F2 O3      | Phenol                        | 1  |
| Dinoseb or Dinoterb or Subitex                                             | C10 H12 N2 O5     | Pesticide - phenolic          | 18 |
| Dinoseb or Dinoterb or Subitex                                             | C10 H12 N2 O5     | Pesticide - phenolic          | 7  |
| Dinoseb or Dinoterb or Subitex                                             | C10 H12 N2 O5     | Pesticide - phenolic          | 1  |
| Dinoseb-acetate metabolite                                                 | C12 H14 N2 O7     | Pesticide metabolite - phenol | 1  |
| Dinoterb metabolite or Subitex metabolite                                  | C10 H12 N2 O6     | Pesticide metabolite - phenol | 1  |
| Dioxacarb artifact or Ethyl-p-hydroxybenzoate (Ethyl paraben)              | C9 H10 O3         | Phenol                        | 17 |
| Dioxacarb artifact or Ethyl-p-hydroxybenzoate (Ethyl paraben)              | C9 H10 O3         | Phenol                        | 5  |
| Diphenolic acid                                                            | C17 H18 O4        | Phenol                        | 9  |
| DNOC (2,4-Dinitro-o-kresol)                                                | C7 H6 N2 O5       | Pesticide - phenolic          | 12 |
| Enterodiol                                                                 | C18 H22 O4        | Phenol                        | 18 |
| Enterolactone                                                              | C18 H18 O4        | Phenol                        | 8  |
| Equol                                                                      | C15 H14 O3        | Phenol                        | 14 |
| Estragole                                                                  | C10 H12 O         | Phenol                        | 19 |
| Estrone                                                                    | C18 H22 O2        | Phenol                        | 19 |
| Ethametsulfuron-methyl metabolite or Nicosulfuron metabolite               | C15 H18 N6 O7 S   | Pesticide metabolite - phenol | 2  |
| Ethofumesate metabolite                                                    | C13 H18 O6 S      | Pesticide metabolite - phenol | 12 |
| Etrimfos metabolite                                                        | C10 H17 N2 O5 P S | Pesticide metabolite - phenol | 2  |
| Fenarimol metabolite                                                       | C17 H12 Cl2 N2 O2 | Pesticide metabolite - phenol | 2  |
| Fenoxycarb metabolite or Furalaxyl metabolite                              | C17 H19 N O5      | Pesticide metabolite - phenol | 8  |

|                                                |                     |                               |    |
|------------------------------------------------|---------------------|-------------------------------|----|
| Fenoxycarb metabolite or Furalaxyl metabolite  | C17 H19 N O5        | Pesticide metabolite - phenol | 4  |
| Fenzaflor metabolite                           | C15 H7 Cl2 F3 N2 O3 | Pesticide metabolite - phenol | 1  |
| Fluorotelomer hexanoic acid                    | C7 H3 F13 O2        | PFC                           | 4  |
| Fluridone metabolite                           | C19 H14 F3 N O2     |                               | 1  |
| Fluvalinate metabolite                         | C26 H22 Cl F3 N2 O4 | Pesticide metabolite - phenol | 3  |
| Foramsulfuron metabolite                       | C17 H20 N6 O8 S     | Pesticide metabolite - phenol | 4  |
| Formetanate metabolite                         | C11 H15 N3 O3       | Pesticide metabolite - phenol | 15 |
| Genistein                                      | C15 H10 O5          | Phenol                        | 2  |
| Glyphosate                                     | C3 H8 N O5 P        | Pesticide-acid                | 1  |
| Hymecromone                                    | C10 H8 O3           | Pesticide - phenolic          | 2  |
| Imazalil metabolite                            | C32 H40 N4 O7       | Pesticide metabolite - phenol | 3  |
| Imazapyr or Pyrolan metabolite                 | C13 H15 N3 O3       | Pesticide-acid                | 8  |
| Imazapyr or Pyrolan metabolite                 | C13 H15 N3 O3       | Pesticide-acid                | 6  |
| Isofenphos metabolite                          | C15 H24 N O5 P S    | Pesticide metabolite - phenol | 1  |
| Isoproturon metabolite                         | C12 H18 N2 O2       | Pesticide metabolite - phenol | 1  |
| Isoxaben metabolite                            | C18 H24 N2 O5       | Pesticide metabolite - phenol | 5  |
| Jasmolin I                                     | C21 H30 O3          | Pesticide-acid                | 8  |
| Jasmolin II                                    | C22 H30 O5          | Pesticide-acid                | 7  |
| Karbutilate metabolite                         | C14 H21 N3 O4       | Pesticide metabolite - phenol | 2  |
| Kresoxim-methyl metabolite                     | C18 H19 N O5        | Pesticide metabolite - phenol | 4  |
| Lambast metabolite                             | C12 H23 N5 O3 S     | Pesticide metabolite - phenol | 3  |
| MBHA or O-Desmethylangolensin                  | C15 H14 O4          | Phenol                        | 3  |
| MBHA or O-Desmethylangolensin                  | C15 H14 O4          | Phenol                        | 3  |
| Medinoterbacetate metabolite                   | C13 H16 N2 O7       | Pesticide metabolite - phenol | 10 |
| Metalaxyl metabolite                           | C15 H21 N O5        | Pesticide metabolite - phenol | 1  |
| Methoxychlor (-HCl) metabolite                 | C16 H14 Cl2 O3      | Pesticide metabolite - phenol | 1  |
| Methoxyphenone metabolite                      | C16 H16 O3          | Pesticide metabolite - phenol | 5  |
| Methyl eugenol                                 | C11 H14 O2          | Phenol                        | 14 |
| Metsulfuron-methyl metabolite                  | C14 H15 N5 O7 S     | Pesticide metabolite - phenol | 1  |
| MNFA metabolite metabolite                     | C13 H12 F N O2      | Pesticide metabolite - phenol | 5  |
| Monalide metabolite or Pentanochlor metabolite | C13 H18 Cl N O2     | Pesticide metabolite - phenol | 1  |

|                                                                                                                                                    |                 |                               |    |
|----------------------------------------------------------------------------------------------------------------------------------------------------|-----------------|-------------------------------|----|
| Monalide metabolite or Pentanochlor metabolite                                                                                                     | C13 H18 Cl N O2 | Pesticide metabolite - phenol | 1  |
| Mono (2-carboxymethylhexyl) phthalate or Mono (2-ethyl-5-carboxypentyl) phthalate or Monocarboxyheptyl phthalate or Monocarboxyisoheptyl phthalate | C16 H20 O6      | Phthalate metabolite          | 13 |
| Mono (2-carboxymethylhexyl) phthalate or Mono (2-ethyl-5-carboxypentyl) phthalate or Monocarboxyheptyl phthalate or Monocarboxyisoheptyl phthalate | C16 H20 O6      | Phthalate metabolite          | 6  |
| Mono (2-ethyl-5-oxohexyl) phthalate                                                                                                                | C16 H20 O5      | Phthalate metabolite          | 12 |
| Mono (2-ethylhexyl) phthalate or Monoisooctyl phthalate or Monooctyl phthalate                                                                     | C16 H22 O4      | Phthalate metabolite          | 18 |
| Mono (2-ethylhexyl) phthalate or Monoisooctyl phthalate or Monooctyl phthalate                                                                     | C16 H22 O4      | Phthalate metabolite          | 16 |
| Mono (2-ethylhexyl) phthalate or Monoisooctyl phthalate or Monooctyl phthalate                                                                     | C16 H22 O4      | Phthalate metabolite          | 8  |
| Mono (2-ethylhydroxyhexyl) phthalate                                                                                                               | C16 H22 O5      | Phthalate metabolite          | 4  |
| Mono (2-propylheptyl) phthalate or Monodecyl phthalate or Monoisodecyl phthalate                                                                   | C18 H26 O4      | Phthalate metabolite          | 16 |
| Mono (2-propylheptyl) phthalate or Monodecyl phthalate or Monoisodecyl phthalate                                                                   | C18 H26 O4      | Phthalate metabolite          | 11 |
| Mono (2-propylheptyl) phthalate or Monodecyl phthalate or Monoisodecyl phthalate                                                                   | C18 H26 O4      | Phthalate metabolite          | 8  |
| Mono (4-methyl-7-carboxyheptyl)phthalate or Monocarboxyisooctyl phthalate                                                                          | C17 H22 O6      | Phthalate metabolite          | 6  |
| Mono (4-methyl-7-carboxyheptyl)phthalate or Monocarboxyisooctyl phthalate                                                                          | C17 H22 O6      | Phthalate metabolite          | 5  |
| Mono (4-methyl-7-oxo-octyl)phthalate or Monooxoisononyl                                                                                            | C17 H22 O5      | Phthalate metabolite          | 6  |

|                                                      |                    |                               |    |
|------------------------------------------------------|--------------------|-------------------------------|----|
| phthalate                                            |                    |                               |    |
| Mono 3-carboxypropyl phthalate                       | C12 H12 O6         | Phthalate metabolite          | 3  |
| Monoallyl phthalate                                  | C11 H10 O4         | Phthalate metabolite          | 17 |
| Monobenzyl phthalate                                 | C15 H12 O4         | Phthalate metabolite          | 3  |
| Monobutyl phthalate or<br>Monoisobutyl phthalate     | C12 H14 O4         | Phthalate metabolite          | 18 |
| Monobutyl phthalate or<br>Monoisobutyl phthalate     | C12 H14 O4         | Phthalate metabolite          | 5  |
| Monocarboxyisononyl phthalate                        | C18 H24 O6         | Phthalate metabolite          | 4  |
| Monocyclohexyl phthalate                             | C14 H16 O4         | Phthalate metabolite          | 5  |
| Monoethyl phthalate                                  | C10 H10 O4         | Phthalate metabolite          | 1  |
| Monoheptyl phthalate or<br>Monoisoheptyl phthalate   | C15 H20 O4         | Phthalate metabolite          | 19 |
| Monoheptyl phthalate or<br>Monoisoheptyl phthalate   | C15 H20 O4         | Phthalate metabolite          | 15 |
| Monohydroxyisononyl phthalate                        | C17 H24 O5         | Phthalate metabolite          | 4  |
| Monoisohexyl phthalate or<br>Monohexyl phthalate     | C14 H18 O4         | Phthalate metabolite          | 19 |
| Monoisohexyl phthalate or<br>Monohexyl phthalate     | C14 H18 O4         | Phthalate metabolite          | 16 |
| Monoisononyl phthalate                               | C17 H24 O4         | Phthalate metabolite          | 15 |
| Monoisotridecyl phthalate                            | C21 H32 O4         | Phthalate metabolite          | 19 |
| Monoisoundecyl phthalate or<br>Monoundecyl phthalate | C19 H28 O4         | Phthalate metabolite          | 18 |
| Monopentyl phthalate                                 | C13 H16 O4         | Phthalate metabolite          | 4  |
| Monopropyl phthalate                                 | C11 H12 O4         | Phthalate metabolite          | 7  |
| Myclobutanil metabolite                              | C15 H17 Cl N4 O    | Pesticide metabolite - phenol | 6  |
| Naphthoxyacetic acid                                 | C12 H10 O3         | Pesticide-acid                | 3  |
| Nitraline metabolite                                 | C13 H19 N3 O7 S    |                               | 1  |
| Nitrofen metabolite                                  | C12 H7 Cl2 N O4    | Pesticide metabolite - phenol | 2  |
| Nonylphenol diethoxylate                             | C19 H32 O3         | Phenol                        | 18 |
| Nonylphenol monoethoxylate                           | C17 H28 O2         | Phenol                        | 20 |
| Nuarimol metabolite                                  | C17 H12 Cl F N2 O2 | Pesticide metabolite - phenol | 3  |
| Octylphenol diethoxylate                             | C18 H30 O3         | Phenol                        | 20 |

|                                                                                   |                    |                               |    |
|-----------------------------------------------------------------------------------|--------------------|-------------------------------|----|
| Octylphenol monoethoxylate                                                        | C16 H26 O2         | Phenol                        | 20 |
| Oryzalin metabolite                                                               | C12 H18 N4 O7 S    | Pesticide metabolite - phenol | 2  |
| Oxadixyl metabolite                                                               | C14 H18 N2 O5      | Pesticide metabolite - phenol | 8  |
| Oxycarboxin metabolite                                                            | C12 H13 N O5 S     | Pesticide metabolite - phenol | 1  |
| paraquat metabolite                                                               | C12 H14 N2 O       | Pesticide metabolite - phenol | 4  |
| Parathion metabolite                                                              | C10 H14 N O6 P S   | Pesticide metabolite - phenol | 1  |
| Pentachlorophenol                                                                 | C6 H Cl5 O         | Phenol                        | 16 |
| Perfluoro-3,7-bis(trifluoromethyl)-<br>octanoic acid or Perfluorodecanoic<br>acid | C10 H F19 O2       | PFC                           | 15 |
| Perfluorodecane sulfonic acid                                                     | C10 H F21 O3 S     | PFC                           | 2  |
| Perfluorodecyl ethanoic acid                                                      | C12 H3 F21 O2      | PFC                           | 17 |
| Perfluoroheptadecanoic acid<br>(PFHpDA)                                           | C17 H F33 O2       | PFC                           | 3  |
| Perfluoroheptane sulfonic acid                                                    | C7 H F15 O3 S      | PFC                           | 19 |
| Perfluoroheptanoic acid                                                           | C7 H F13 O2        | PFC                           | 5  |
| Perfluorohexanesulfonic acid                                                      | C6 H F13 O3 S      | PFC                           | 19 |
| Perfluorohexyl ethanoic acid                                                      | C8 H3 F13 O2       | PFC                           | 7  |
| Perfluorononanoic acid                                                            | C9 H F17 O2        | PFC                           | 20 |
| Perfluorooctane sulfonic acid                                                     | C8 H F17 O3 S      | PFC                           | 20 |
| Perfluorooctanoic acid                                                            | C8 H F15 O2        | PFC                           | 18 |
| Perfluorooctyl ethanoic acid                                                      | C10 H3 F17 O2      | PFC                           | 4  |
| Perfluoropentane sulfonic acid<br>(PFPS)                                          | C5 H F11 O3 S      | PFC                           | 4  |
| Perfluoropentanoic acid                                                           | C5 H F9 O2         | PFC                           | 13 |
| Perfluorotridecanoic acid                                                         | C13 H F25 O2       | PFC                           | 4  |
| Perfluoroundecanoic acid                                                          | C11 H F21 O2       | PFC                           | 6  |
| Phenol red                                                                        | C19 H14 O5 S       | Phenol                        | 1  |
| Phenol, styrenated                                                                | C10 H10 O          | Phenol                        | 5  |
| Phenothrin metabolite                                                             | C23 H26 O4         | Pesticide metabolite - phenol | 4  |
| Phenyl isocyanate metabolite                                                      | C7 H5 N O2         | Pesticide metabolite - phenol | 9  |
| Phosmet metabolite                                                                | C11 H12 N O5 P S2  | Pesticide metabolite - phenol | 2  |
| Primisulfuron-methyl metabolite                                                   | C15 H12 F4 N4 O8 S | Pesticide metabolite - phenol | 2  |



|                             |                    |                               |    |
|-----------------------------|--------------------|-------------------------------|----|
| Prodiamine metabolite       | C13 H17 F3 N4 O5   | Pesticide metabolite - phenol | 18 |
| Promecarb metabolite        | C12 H17 N O3       | Pesticide metabolite - phenol | 20 |
| Propargite metabolite       | C19 H26 O5 S       | Pesticide metabolite - phenol | 15 |
| Propham metabolite          | C10 H13 N O3       | Pesticide metabolite - phenol | 20 |
| Propiconazole metabolite    | C15 H17 Cl2 N3 O3  | Pesticide metabolite - phenol | 3  |
| Prosulfocarb metabolite     | C14 H21 N O2 S     | Pesticide metabolite - phenol | 8  |
| Prosulfuron metabolite      | C15 H16 F3 N5 O5 S | Pesticide metabolite - phenol | 2  |
| Proximpham metabolite       | C10 H12 N2 O3      | Pesticide metabolite - phenol | 1  |
| Pyracarbolid metabolite     | C13 H15 N O3       | Pesticide metabolite - phenol | 3  |
| Pyrethrin II                | C22 H28 O5         | Pesticide-acid                | 15 |
| Pyrocatechol                | C6 H6 O2           | Pesticide - phenolic          | 20 |
| Quinoamide metabolite       | C12 H6 Cl3 N O4    | Pesticide metabolite - phenol | 4  |
| Quintiofos metabolite       | C17 H16 N O3 P S   | Pesticide metabolite - phenol | 1  |
| Siduron metabolite          | C14 H20 N2 O2      | Pesticide metabolite - phenol | 4  |
| Sorbic acid                 | C6 H8 O2           |                               | 1  |
| Tebutam metabolite          | C15 H23 N O2       | Pesticide metabolite - phenol | 1  |
| Tecnazene metabolite        | C6 H Cl4 N O3      | Pesticide metabolite - phenol | 3  |
| Tralkoxydime metabolite     | C20 H27 N O4       |                               | 1  |
| trans-Methacrifos           | C7 H13 O5 P S      | Pesticide-acid                | 1  |
| Trichlophenidine metabolite | C16 H13 Cl5 N2 O   | Pesticide metabolite - phenol | 1  |
| Triclocarban                | C13 H9 Cl3 N2 O    | Phenol                        | 1  |
| Tricyclazole metabolite     | C9 H7 N3 O S       | Pesticide metabolite - phenol | 1  |
| Trifloxystrobin metabolite  | C20 H19 F3 N2 O5   | Pesticide metabolite - phenol | 9  |
| Trimethacarb metabolite     | C11 H15 N O3       | Pesticide metabolite - phenol | 1  |

**Figure S1.** Comparison of the number of EOA hits obtained from two different methods of sample preparation: protein precipitation (PP) (n=110) and solid phase extraction (SPE) (n=135)

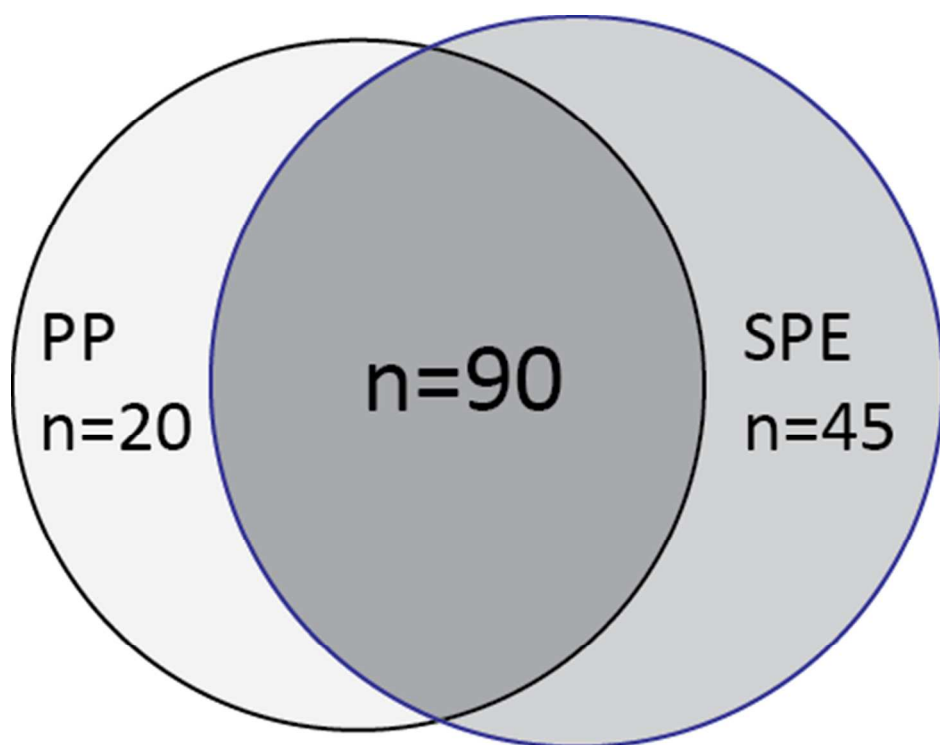

Supplement: NIHMS935371-supplement-1.pdf [file NIHMS935371-supplement-1.pdf]
